## Coronary 18F-sodium fluoride uptake predicts progression of coronary arterial calcification

M. Doris<sup>1</sup>, A.J. Moss<sup>1</sup>, J.P.M. Andrews<sup>1</sup>, M. Williams<sup>2</sup>, E.J.R. Van Beek<sup>2</sup>, L. Forsyth<sup>3</sup>, M.R. Dweck<sup>1</sup>, D.E. Newby<sup>1</sup>, P.D. Adamson<sup>4</sup>

<sup>1</sup>University of Edinburgh, British Heart Foundation Centre for Cardiovascular Science, Edinburgh, United Kingdom; <sup>2</sup>University of Edinburgh, Edinburgh Imaging, Queen's Medical Research Institute, Edinburgh, United Kingdom; <sup>3</sup>University of Edinburgh, Edinburgh Clinical Trials Unit, Edinburgh, United Kingdom; <sup>4</sup>University of Otago Christchurch, Christchurch Heart Institute, University of Otago, Christchurch, New Zealand

**Funding Acknowledgement:** AstraZeneca (unrestricted educational grant). British Heart Foundation (CH/09/002, RE/13/3/30183, FS/17/79/33226) Wellcome Trust (WT103782AIA).

**Background:** Combined positron emission tomography and computed tomography (PET-CT) using 18F-sodium fluoride (18F-NaF) to detect micro-calcification provides the opportunity to gain important insights into disease activity in coronary atherosclerosis. However, the relationship between 18F-NaF uptake and progression of coronary calcification has not been determined.

**Purpose:** To determine the relationship between 18F-NaF uptake and progression of coronary calcification in patients with clinically stable coronary artery disease (CAD).

**Methods:** Patients with established, multivessel CAD underwent 18F-NaF PET-CT and CT coronary calcium scoring at baseline, with repeat CT calcium scoring at one year. Coronary arterial PET uptake was analysed qualitatively and semi-quantitatively in diseased vessels by measuring maximum tissue-to-background ratio (TBRmax) – defined as the maximum standardised uptake value in a plaque divided by mean blood pool activity measured in the right atrium. Coronary calcification was quantified by measuring calcium mass, volume, average calcium density and total Agatston score (AU).

**Results:** In total, 185 patients underwent baseline and repeat imaging (median age 66 years, 80% men), and 118 (64%) had increased 18F-NaF uptake in at least one vessel. Median total calcium score, volume, mass and average density were higher in patients with compared to those without increased 18F-NaF uptake (Table 1). At one year, patients with evidence of increased 18F-NaF uptake demonstrated more rapid progression of coronary calcification (97 [39–166] AU) versus those without uptake (35 [7–93] AU;  $p < 0.0001$ ). Amongst 18F-NaF-positive patients, the calcium score increased only in coronary segments with 18F-NaF uptake (baseline 90.5 [27.5–202] AU versus one year 135.5 [59.3–281.8] AU;  $p < 0.0001$ ) and not in 18F-NaF-negative segments (baseline 44.5 [16–110.5] AU versus one year 46.5 [18.25–114] AU;  $p = 0.446$ ). There was a moderate correlation between TBRmax and change in total calcium score, volume and mass at 1 year (Spearman's Rho = 0.37, 0.38, 0.46 respectively;  $p < 0.0001$  for all).

**Conclusions:** Coronary 18F-NaF uptake identifies both patients and individual coronary segments with greater disease and more rapid progression of coronary calcification over one year.

Coronary calcification at baseline in PET-negative and PET-positive patients

|                                       | All patients (n=185) | 18F-NaF Positive (n=118) | 18F-NaF Negative (n=67) | P value      |
|---------------------------------------|----------------------|--------------------------|-------------------------|--------------|
| Agatston Score (AU)                   | 381 [107–892]        | 541 [245–1130]           | 136 [55–361]            | $p < 0.0001$ |
| Calcium Volume (mm <sup>3</sup> )     | 358 [131–787]        | 506 [251–1014]           | 131 [64–343]            | $p < 0.0001$ |
| Calcium Mass (mg)                     | 71 [23–155]          | 100 [48–222]             | 24 [11–69]              | $p < 0.0001$ |
| Average Density (mg/mm <sup>3</sup> ) | 0.19 [0.17–0.22]     | 0.20 [0.18–0.23]         | 0.18 [0.16–0.20]        | $p < 0.0001$ |

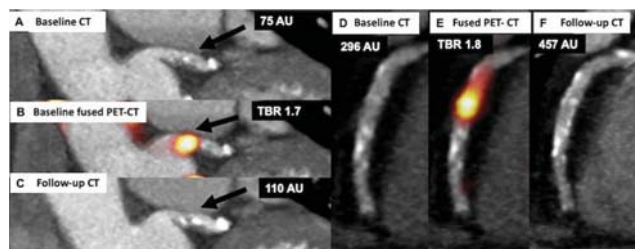

Source: http://academic.oup.com/eurheartj/article-pdf/40/Supplement_1/ehz747.0051/30196818/ehz747.0051.pdf
